# Supplementary material for: Two layered galloborates from centric to acentric structures: syntheses and NLO properties
Source: Royal Society of Chemistry journal article supplement (doi:10.1039/d2cc03117e), 2022-01-01
Supplement: d2cc03117e1.pdf [file d2cc03117e1.pdf]

## Electronic Supporting Information

# Two Layered Galloborates from Centric to Acentric Structures: Syntheses and NLO Property

Chong-An Chen, Wen-Fang Liu and Guo-Yu Yang\*

MOE Key Laboratory of Cluster Science, School of Chemistry and Chemical Engineering, Beijing Institute of Technology, Beijing 100081, China. E-mail: ygy@bit.edu.cn, ygy@fjirsm.ac.cn, Fax: (+86) 10-6891-8572

### Experimental Section

**Table S1.** Crystallographic data and structural refinements for **1-2**.

**Table S2.** Hydrogen bond distances (Å) and angles (°) for **2**.

**Table S3.** Selected bond lengths (Å) and angles (°) for compound **1**.

**Table S4.** Selected bond lengths (Å) and angles (°) for compound **2**.

**Figure S1.** a) Asymmetric unit of **1**; b) Na<sub>10</sub>O<sub>6</sub>/Na<sub>2</sub>O<sub>6</sub> polyhedra in **1**; c) Locations of Na<sup>1+</sup>/Na<sup>2+</sup> in the framework of **1**.

**Figure S2.** a) 3D *dia* framework of K<sub>2</sub>GeB<sub>4</sub>O<sub>9</sub>·2H<sub>2</sub>O; b) 3D *CrB<sub>4</sub>* framework of GeB<sub>4</sub>O<sub>9</sub>·H<sub>2</sub>O; c) 3D *crb* framework of **3**; d) 2D *sql* layer of **1**; e) Coordination environment of GaO<sub>4</sub> unit in **3**; f) Coordination environment of B<sub>4</sub>O<sub>9</sub> unit in **3**; g-h) View of the 3D open frameworks of **3** along different axes.

**Figure S3.** The further polymerization from B<sub>4</sub>O<sub>9</sub> cluster to B<sub>7</sub>O<sub>13</sub>(OH) cluster. H atom is omitted for clarity.

**Figure S4.** a) Na<sub>10</sub>O<sub>5</sub>/Na<sub>3</sub>O<sub>4</sub> polyhedra in **2**; b) Na<sub>2</sub>O<sub>7</sub> polyhedra the 1D Na<sub>2</sub>-O chain in **2**; c) 3D supramolecular framework of **2** with guest Na<sup>+</sup> and B(OH)<sub>3</sub> molecules locate in the layer and interlayer.

**Figure S5.** a) The B<sub>7</sub>O<sub>12</sub>(OH)<sub>3</sub> cluster in [H<sub>3</sub>N(CH<sub>2</sub>)<sub>6</sub>NH<sub>3</sub>][B<sub>7</sub>O<sub>10</sub>(OH)<sub>3</sub>]; b) 2D monolayer with 9-MR windows in [H<sub>3</sub>N(CH<sub>2</sub>)<sub>6</sub>NH<sub>3</sub>][B<sub>7</sub>O<sub>10</sub>(OH)<sub>3</sub>]; c) Side view of the layer in [H<sub>3</sub>N(CH<sub>2</sub>)<sub>6</sub>NH<sub>3</sub>][B<sub>7</sub>O<sub>10</sub>(OH)<sub>3</sub>].

**Figure S6.** a-f) Six known different linkages between MO<sub>n</sub> (n=4/5/6) polyhedral and oxoboron clusters; g) The new linkage of GaO<sub>4</sub> and 1D oxoboron cluster-chain in **2**.

**Figure S7.** TG-DSC curves of **1**(a) and **2**(b).

**Figure S8.** PXRD patterns before and after thermal treatments of **1** (a) and **2** (b).

**Figure S9.** IR spectra of **1** (a) and **2** (b).

**Figure S10.** UV-Vis spectra of **1** (a) and **2** (b).

## Experimental Section

**Syntheses:** In the typical syntheses of **1**, the powder mixture of H<sub>3</sub>BO<sub>3</sub> (0.248 g, 4 mmol), Na<sub>2</sub>CO<sub>3</sub> (0.046 g, 0.44 mmol), Ba(OH)<sub>2</sub>·8H<sub>2</sub>O (0.315 g, 1 mmol) and Ga(i-Pro)<sub>3</sub> (0.123 g, 0.5 mmol) were added in the mixed solution of 2 mL pyridine and 1 mL H<sub>2</sub>O, and stirred for one hour. The final mixed solution was sealed in a 23-mL Teflon-lined stainless-steel reactor and heated at 210 °C for 7 days. After cooling down to room temperature, block-like colorless crystals of **1** were obtained. (Yield: 45.0% basing on Na<sub>2</sub>CO<sub>3</sub>). By raising the B/Ga ratio in the reactants from 8:1 to 16:1 (8 mmol H<sub>3</sub>BO<sub>3</sub> and 0.5 mmol Ga(i-Pro)<sub>3</sub>) and raising the temperature from 210 to 230 °C with other conditions unchanged, flake-like colorless crystals of **2** was obtained. (Yield: 27.0% basing on Na<sub>2</sub>CO<sub>3</sub>). Ba(OH)<sub>2</sub> is used as mineralizer. Strong alkalis are commonly used mineralizers in hydro(solvo)thermal syntheses of borates, especially in the mid/low-temperature hydro(solvo)thermal conditions.<sup>1-3</sup> Using the same B/Ga ratio of 16:1 and the temperature of 210 °C, **2** cannot be obtained.

[1] C. McMillen, C. Heyward, H. Giesber and J. Kolis, *J. Solid. State. Chem.*, 2011, **184**, 2966-2971.

[2] X. F. Wang, F. F. Zhang, B. H. Lei, Z. H. Yang and S. L. Pan, *RSC Adv.*, 2016, **6**, 100849-100856.

[3] C. C. Peng, H. K. Liu and K. H. Lii, *Inorg. Chem.*, 2018, **57**, 1545-1549.

Single-crystal X-ray diffraction data of **1** and **2** were collected on a Gemini A Ultra and Bruker APEX-II diffractometer using Mo K $\alpha$  radiation ( $\lambda = 0.71073 \text{ \AA}$ ) at 293K, respectively. The structure was solved by direct methods and refined by full-matrix least-squares fitting on F<sup>2</sup> methods with SHELXTL-2013 program.<sup>1</sup> PLATON was used for checking higher structural symmetries and no higher symmetries were found.<sup>2</sup> Absorption corrections were conducted by multi-scan methods for **1** and **2**. Anisotropic displacement parameters were refined for all atoms except for hydrogen atoms. Hydrogen atoms were geometrically placed and refined by riding model. Detailed crystallographic data and structure refinement were summarized in Table S1. CCDC 2145342 (**1**) and 2145343 (**2**) contain the detailed crystallographic data for this paper.

All the reagents were analytical grade and used without any further purification. Powder X-ray diffraction (PXRD) data were collected on a Bruker D8 Advance X-ray diffractometer with Cu K $\alpha$  radiation ( $\lambda = 1.54056 \text{ \AA}$ ) in the angular range of  $2\theta = 5\text{--}50^\circ$ . Thermogravimetric analyses were conducted on a Mettler Toledo TGA/DSC 1100 analyzer in the air atmosphere heating up from 25 to 1000 °C, raising 10 °C per min. UV-Vis spectra were recorded on a Shimadzu UV3600 spectrometer with the wavelengths scanning from 190 to 800 nm. Infrared spectra were recorded on a Nicolet iS10 FT-IR spectrometer with the wavenumbers ranging from 4000-400 cm<sup>-1</sup>.

SHG measurements were conducted on a Q-switched Nd:YAG laser with the fundamental light wavelength of 1064 nm. The single crystal samples of **2** and KDP (standard sample) were sieved into five different sizes: 25–45, 45–62, 62–75, 75–109 and 109–150  $\mu\text{m}$ . The samples were pressed between two rounded 1 mm thick quartz glasses

with a 2 mm thick rubber ring interlayer. The diameter of the spot area is about 8mm. The samples are tightly sealed in an aluminous round box with an 8mm diameter hole in the center. The laser power density is 35 MW/cm<sup>2</sup>. The intensities of the harmonic generation signals were measured by a photomultiplier tube attached to a RIGOL DS1052E 50 MHz oscilloscope.

[1] a) G. M. Sheldrick, *SHELXTL-97, Program for Solution of Crystal Structures; University of Göttingen: Germany 1997*; b) G. M. Sheldrick, *SHELXS-97, Program for Solution of Crystal Refinement; University of Göttingen: Germany 1997*.

[2] A. L. Spek, *J. Appl. Crystallogr.*, 2003, **36**, 7–13.

**Table S1** Crystallographic data and structural refinements for **1-2**.

|                                                     | <b>1</b>                                            | <b>2</b>                                                         |
|-----------------------------------------------------|-----------------------------------------------------|------------------------------------------------------------------|
| Empirical formula                                   | Na <sub>3</sub> GaB <sub>4</sub> O <sub>9</sub>     | Na <sub>5</sub> GaB <sub>16</sub> O <sub>32</sub> H <sub>8</sub> |
| Formula weight                                      | 325.93                                              | 877.69                                                           |
| Crystal system                                      | monoclinic                                          | monoclinic                                                       |
| Space group                                         | <i>P</i> 2 <sub>1</sub> / <i>m</i>                  | <i>C</i> <sub>2</sub>                                            |
| <i>a</i> /Å                                         | 6.2135(12)                                          | 16.5740(5)                                                       |
| <i>b</i> /Å                                         | 8.6750(18)                                          | 7.3430(2)                                                        |
| <i>c</i> /Å                                         | 6.7916(12)                                          | 11.7190(4)                                                       |
| $\alpha$ /°                                         | 90                                                  | 90                                                               |
| $\beta$ /°                                          | 99.265 (16)                                         | 114.622(6)                                                       |
| $\gamma$ /°                                         | 90                                                  | 90                                                               |
| <i>V</i> /Å <sup>3</sup>                            | 361.31 (12)                                         | 1296.4(7)                                                        |
| <i>Z</i>                                            | 2                                                   | 2                                                                |
| <i>D<sub>c</sub></i> /g cm <sup>-3</sup>            | 2.996                                               | 2.248                                                            |
| $\mu$ /mm <sup>-1</sup>                             | 4.023                                               | 1.285                                                            |
| <i>F</i> (000)                                      | 312                                                 | 860                                                              |
| Diffractive Indices                                 | -8≤ <i>h</i> ≤6, -10≤ <i>k</i> ≤11, -8≤ <i>l</i> ≤9 | -18≤ <i>h</i> ≤19, -8≤ <i>k</i> ≤8, -14≤ <i>l</i> ≤13            |
| Goodness-of-fit on <i>F</i> <sup>2</sup>            | 1.088                                               | 1.029                                                            |
| Final <i>R</i> indices ( <i>I</i> > 2σ( <i>I</i> )) | 0.0279 (0.0700)                                     | 0.0482 (0.0958)                                                  |
| <i>R</i> indices (all data)                         | 0.0297 (0.0715)                                     | 0.0725 (0.1033)                                                  |
| Largest Peak/Deepest hole                           | 0.632/-0.900                                        | 0.455/-0.585                                                     |
| [e·Å <sup>-3</sup> ]                                |                                                     |                                                                  |

<sup>a</sup>*R*<sub>1</sub> =  $\sum ||F_o| - |F_c| | / \sum |F_o|$ . *wR*<sub>2</sub> =  $\{\sum w[(F_o)^2 - (F_c)^2]^2 / \sum w[(F_o)^2]^2\}^{1/2}$

**Table S2.** Hydrogen bond distances (Å) and angles (°) for the compound **2**.

| D–H···A               | d(D–H) | d(H···A) | d(D···A) | ∠(DHA) (°) |
|-----------------------|--------|----------|----------|------------|
| O(7)–H(1)···O(1)#1    | 0.86   | 1.94     | 2.7593   | 158.7      |
| O(7)–H(1)···O(16)#2   | 0.86   | 2.55     | 3.1314   | 126.0      |
| O(11)–H(11)···O(16)#2 | 0.82   | 2.06     | 2.8194   | 153.0      |
| O(12)–H(12)···O(1)#2  | 0.86   | 2.55     | 3.3377   | 154.0      |
| O(13)–H(13)···O(15)#2 | 0.85   | 2.11     | 2.8081   | 139.0      |

**Symmetric codes:** #1: 1/2-x, -1/2+y, -z; #2: 1/2+x, 1/2+y, z.

**Table S3.** Selected bond lengths (Å) and angles (°) for compound **1**.

| Bond Lengths (Å)     |       | Bond Angles (°)                      |        |
|----------------------|-------|--------------------------------------|--------|
| Ga1-O1               | 1.824 | O1-Ga1-O4 <sup>2</sup>               | 112.05 |
| Ga1-O4 <sup>2</sup>  | 1.853 | O1-Ga1-O4 <sup>3</sup>               | 109.84 |
| Ga1-O4 <sup>3</sup>  | 1.853 | O1-Ga1-O6 <sup>4</sup>               | 109.87 |
| Ga1-O6 <sup>4</sup>  | 1.821 | O4 <sup>2</sup> -Ga1-O6 <sup>4</sup> | 111.38 |
| B1-O1                | 1.445 | O4 <sup>3</sup> -Ga1-O6 <sup>4</sup> | 111.38 |
| B1-O2                | 1.501 | O4 <sup>2</sup> -Ga1-O4 <sup>3</sup> | 99.82  |
| B1-O2 <sup>1</sup>   | 1.501 | O1-B1-O3                             | 109.77 |
| B1-O3                | 1.439 | O1-B1-O2                             | 110.40 |
| B2-O2                | 1.381 | O1-B1-O2 <sup>1</sup>                | 110.40 |
| B2-O4                | 1.368 | O2-B1-O3                             | 108.31 |
| B2-O5                | 1.368 | O2 <sup>1</sup> -B1-O3               | 108.31 |
| B3-O3                | 1.420 | O2-B1-O2 <sup>1</sup>                | 109.57 |
| B3-O5                | 1.526 | O2-B2-O4                             | 118.62 |
| B3-O5 <sup>1</sup>   | 1.526 | O2-B2-O5                             | 121.47 |
| B3-O6                | 1.427 | O4-B2-O5                             | 119.86 |
| Na1-O1               | 2.556 | O3-B3-O5                             | 110.38 |
| Na1-O3               | 2.177 | O3-B3-O5 <sup>1</sup>                | 110.38 |
| Na1-O4 <sup>5</sup>  | 2.498 | O3-B3-O6                             | 114.09 |
| Na1-O4 <sup>6</sup>  | 2.498 | O5-B3-O6                             | 108.42 |
| Na1-O5 <sup>7</sup>  | 2.333 | O5 <sup>1</sup> -B3-O6               | 108.42 |
| Na1-O5 <sup>8</sup>  | 2.333 | O5-B3-O5A                            | 104.68 |
| Na2-O1 <sup>9</sup>  | 2.492 |                                      |        |
| Na2-O2 <sup>6</sup>  | 2.600 |                                      |        |
| Na2-O2 <sup>10</sup> | 2.363 |                                      |        |
| Na2-O4 <sup>11</sup> | 2.404 |                                      |        |
| Na2-O5               | 2.551 |                                      |        |
| Na2-O6               | 2.293 |                                      |        |

**Symmetry codes:** **1:** x, 0.5-y, z; **2:** 1-x, 1-y, 2-z; **3:** 1-x, -0.5+y, 2-z; **4:** x, y, 1+z; **5:** 1-x, -0.5+y, 1-z; **6:** 1-x, 1-y, 1-z; **7:** -1+x, 0.5-y, z; **8:** -1+x, y, z; **9:** 1-x, 0.5+y, 1-z; **10:** x, y, -1+z; **11:** 2-x, 1-y, 1-z.

**Table S4.** Selected bond lengths (Å) and angles (°) for compound **2**.

| Bond Lengths         |       | Bond Lengths          |       | Bond Angles            |        |
|----------------------|-------|-----------------------|-------|------------------------|--------|
| Ga1-O1 <sup>1</sup>  | 1.817 | Na1-O7 <sup>5</sup>   | 2.320 | O3-B3-O15              | 113.47 |
| Ga1-O1 <sup>2</sup>  | 1.817 | Na1-O9                | 2.253 | O4-B3-O5               | 108.67 |
| Ga1-O16              | 1.853 | Na1-O16 <sup>6</sup>  | 2.379 | O5-B3-O15              | 107.58 |
| Ga1-O16 <sup>3</sup> | 1.821 | Na2-O1 <sup>7</sup>   | 2.548 | O4-B3-O15              | 111.00 |
| B1-O1                | 1.386 | Na2-O2                | 2.397 | O6-B4-O7               | 120.34 |
| B1-O2                | 1.360 | Na2-O6                | 2.513 | O6-B4-O8               | 125.03 |
| B1-O3                | 1.352 | Na2-O6 <sup>8</sup>   | 2.543 | O7-B4-O8               | 114.62 |
| B2-O2                | 1.430 | Na2-O11               | 2.370 | O5-B5-O8               | 106.10 |
| B2-O5                | 1.505 | Na2-O12 <sup>7</sup>  | 2.515 | O5-B5-O9               | 105.39 |
| B2-O6                | 1.461 | Na2-O14 <sup>8</sup>  | 2.466 | O5-B5-O10 <sup>4</sup> | 110.33 |
| B2-O14               | 1.476 | Na3-O8                | 2.527 | O8-B5-O9               | 110.75 |
| B3-O3                | 1.458 | Na3-O8 <sup>9</sup>   | 2.527 | O8-B5-O10 <sup>4</sup> | 110.80 |
| B3-O4                | 1.468 | Na3-O13 <sup>10</sup> | 2.364 | O9-B5-O10 <sup>4</sup> | 113.12 |
| B3-O5                | 1.526 | Na3-O13 <sup>1</sup>  | 2.364 | O4-B6-O9               | 122.99 |
| B3-O15               | 1.448 |                       |       | O4-B6-O10              | 119.17 |
| B4-O6                | 1.350 |                       |       | O9-B6-O10              | 117.79 |
| B4-O7                | 1.383 |                       |       | O14-B7-O15             | 124.87 |
| B4-O8                | 1.382 |                       |       | O14-B7-O16             | 118.12 |
| B5-O5                | 1.527 |                       |       | O15-B7-O16             | 117.00 |
| B5-O8                | 1.470 |                       |       | O11-B8-O12             | 115.60 |
| B5-O9                | 1.447 |                       |       | O11-B8-O13             | 124.85 |
| B5-O10 <sup>4</sup>  | 1.429 |                       |       | O12-B8-O13             | 119.53 |
| B6-O9                | 1.371 |                       |       |                        |        |
| B6-O10               | 1.374 |                       |       |                        |        |
| B6-O4                | 1.375 |                       |       |                        |        |
| B7-O14               | 1.356 |                       |       |                        |        |
| B7-O15               | 1.362 |                       |       |                        |        |
| B7-O16               | 1.384 |                       |       |                        |        |
| B8-O11               | 1.361 |                       |       |                        |        |
| B8-O12               | 1.387 |                       |       |                        |        |
| B8-O13               | 1.375 |                       |       |                        |        |
| Na1-O3 <sup>4</sup>  | 2.343 |                       |       |                        |        |
| Na1-O4 <sup>4</sup>  | 2.494 |                       |       |                        |        |

  

| Bond Angles                           |        |
|---------------------------------------|--------|
| O1 <sup>1</sup> -Ga1-O1 <sup>2</sup>  | 113.50 |
| O1 <sup>1</sup> -Ga1-O16              | 113.75 |
| O1 <sup>1</sup> -Ga1-O16 <sup>3</sup> | 101.21 |
| O1 <sup>2</sup> -Ga1-O16              | 101.21 |
| O1 <sup>2</sup> -Ga1-O16 <sup>3</sup> | 113.75 |
| O16-Ga1-O16 <sup>3</sup>              | 114.01 |
| O1-B1-O2                              | 117.90 |
| O1-B1-O3                              | 117.83 |
| O2-B1-O3                              | 124.26 |
| O2-B2-O5                              | 109.15 |
| O2-B2-O6                              | 110.28 |
| O2-B2-O14                             | 112.32 |
| O5-B2-O6                              | 108.32 |
| O6-B2-O14                             | 109.11 |
| O5-B2-O14                             | 107.55 |
| O3-B3-O4                              | 109.04 |
| O3-B3-O5                              | 106.90 |

**Symmetry codes:** **1:** x, -1+y, z; **2:** -x, -1+y, -z; **3:** -x, y, -z; **4:** 0.5-x, -0.5+y, 1-z; **5:** 1-x, y, 1-z; **6:** 0.5-x, 0.5+y, 1-z; **7:** 0.5-x, -0.5+y, -z; **8:** 0.5-x, 0.5+y, -z; **9:** 1-x, y, 1-z; **10:** 1-x, -1+y, 1-z.

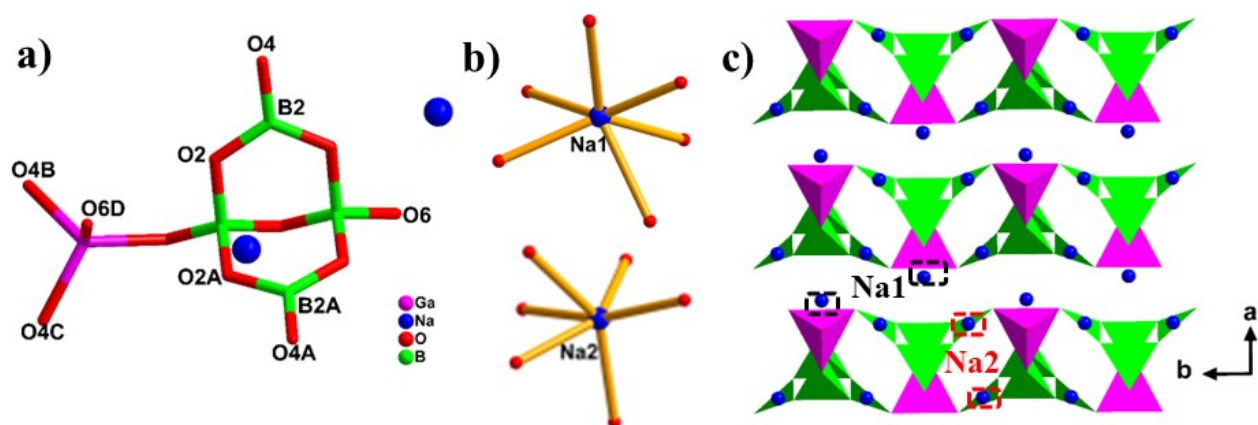

Figure S1. a) Asymmetric unit of **1**; b)  $\text{Na}_1\text{O}_6/\text{Na}_2\text{O}_6$  polyhedra in **1**; c) Locations of  $\text{Na}^{1+}/\text{Na}^{2+}$  in the framework of **1**.

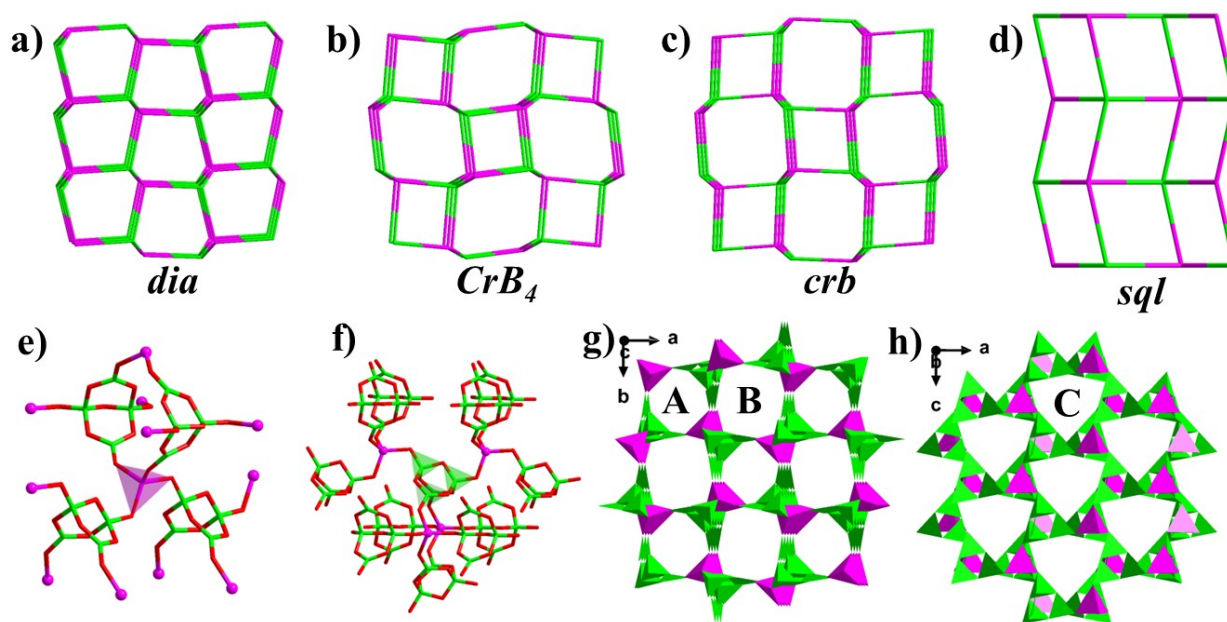

Figure S2. a) 3D *dia* framework of  $\text{K}_2\text{GeB}_4\text{O}_9 \cdot 2\text{H}_2\text{O}$ ; b) 3D  $\text{CrB}_4$  framework of  $\text{GeB}_4\text{O}_9 \cdot \text{H}_2\text{en}$ ; c) 3D *crb* framework of **3**; d) 2D *sql* layer of **1**; e) Coordination environment of  $\text{GaO}_4$  unit in **3**; f) Coordination environment of  $\text{B}_4\text{O}_9$  unit in **3**; g-h) View of the 3D open frameworks of **3** along different axes.

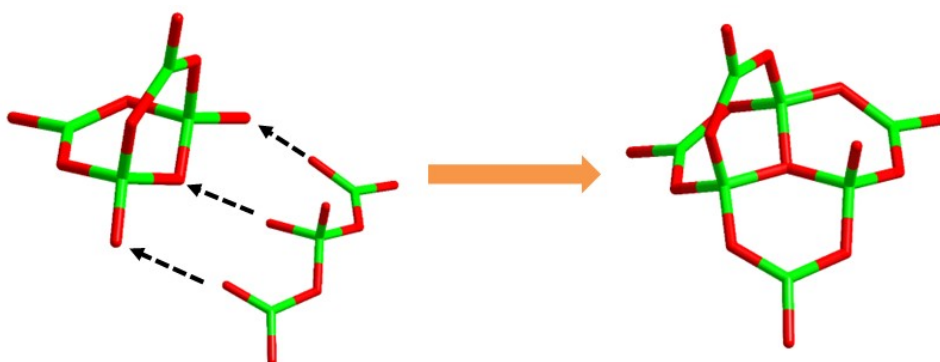

Figure S3. The further polymerization from  $\text{B}_4\text{O}_9$  cluster to  $\text{B}_7\text{O}_{13}(\text{OH})$  cluster. H atom is omitted for clarity.

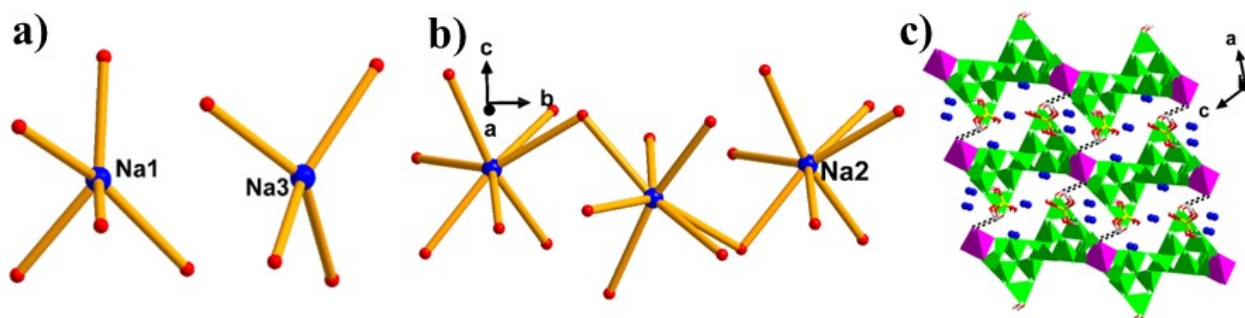

**Figure S4.** a)  $\text{Na1O}_5$  and  $\text{Na3O}_4$  polyhedra in **2**; b)  $\text{Na2O}_7$  polyhedra the 1D  $\text{Na2-O}$  chain in **2**; c) 3D supramolecular framework of **2** with guest  $\text{Na}^+$  and  $\text{B(OH)}_3$  molecules locate in the layer and interlayer.

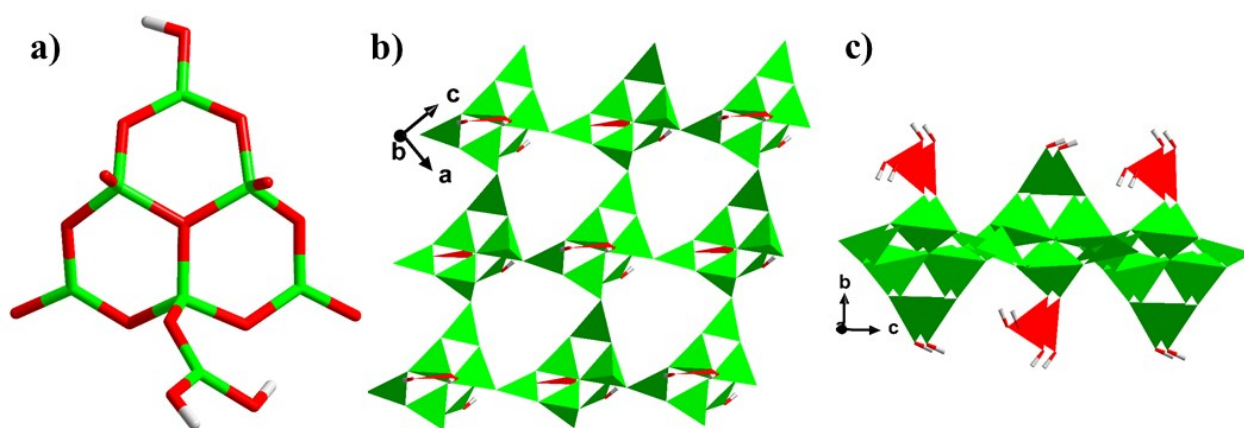

**Figure S5.** a) The  $\text{B}_7\text{O}_{12}(\text{OH})_3$  cluster in  $[\text{H}_3\text{N}(\text{CH}_2)_6\text{NH}_3][\text{B}_7\text{O}_{10}(\text{OH})_3]$ ; b) 2D monolayer with 9-MR windows in  $[\text{H}_3\text{N}(\text{CH}_2)_6\text{NH}_3][\text{B}_7\text{O}_{10}(\text{OH})_3]$ ; c) Side view of the layer in  $[\text{H}_3\text{N}(\text{CH}_2)_6\text{NH}_3][\text{B}_7\text{O}_{10}(\text{OH})_3]$ .

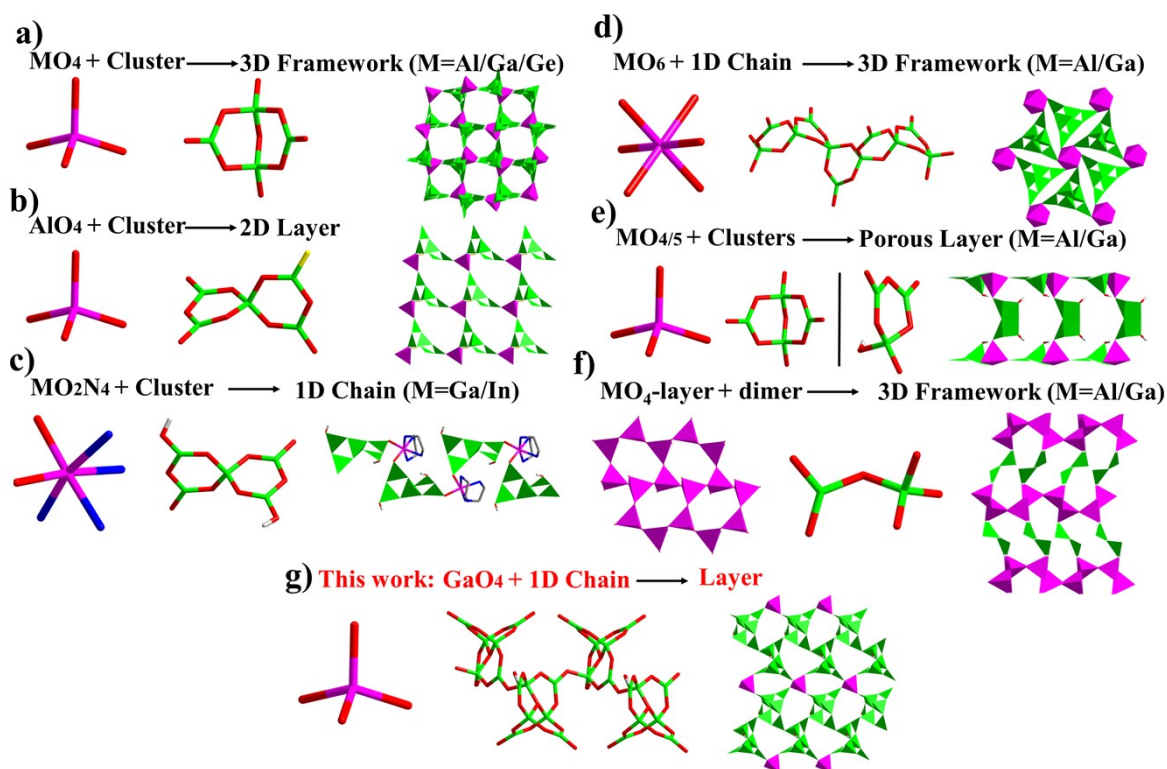

**Figure S6.** a-f) Six known different linkages between  $\text{MO}_n$  ( $n=4/5/6$ ) polyhedra and oxoboron clusters; g) The new linkage of  $\text{GaO}_4$  and 1D oxoboron cluster-chain in **2**.

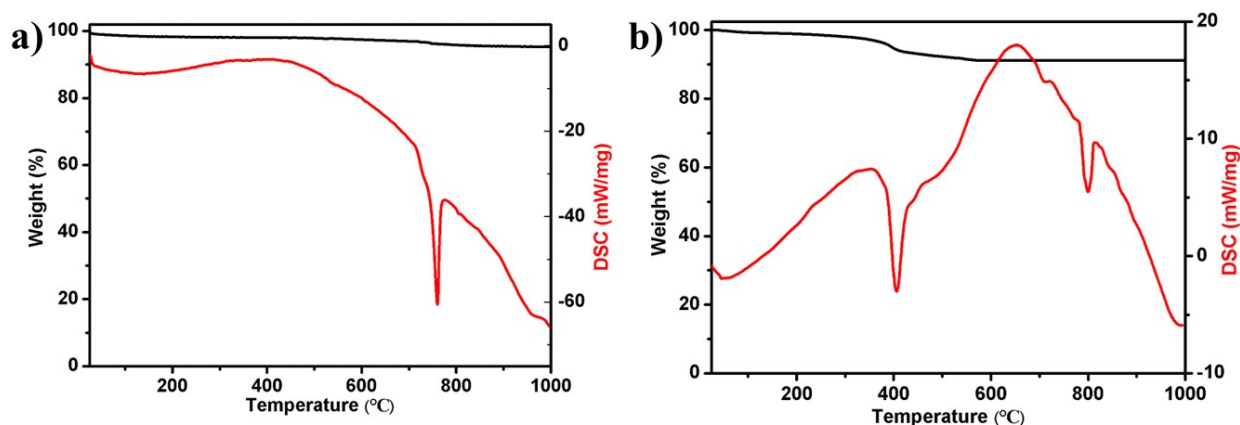

Figure S7. TG-DSC curves of **1**(a) and **2**(b).

For **1**, there is no obvious weight loss from 25-739°C. The minor weight loss of 3.17% from 739-777°C with the endothermic peak at 757°C indicate that the samples start to melt from 739°C, accompanied with the volatilization of partial  $B_2O_3$  residues ( $1.5Na_2O \cdot 0.5Ga_2O_3 \cdot 2B_2O_3$ ).

For **2**, the total weight loss of 8.78% (calculated: 8.20%) from 350-450°C of **2** is attributed to the 4  $H_2O$  from the dehydrations of 2 -OH groups and 2 boric acid molecules, corresponding to the first endothermic peak at 407°C on the DSC curve. The second endothermic peak at 798°C on the DSC curve is attributed to the melting of the residues ( $2.5Na_2O \cdot 0.5Ga_2O_3 \cdot 8B_2O_3$ ).

For further investigating the thermal stabilities of **1** and **2**, the residues after TGA/DSC measurements were checked by PXRD patterns and IR spectra. PXRD patterns show that the residues of both **1** and **2** are amorphous and IR spectra show that the frameworks of **1** and **2** have collapsed after thermal treatments.

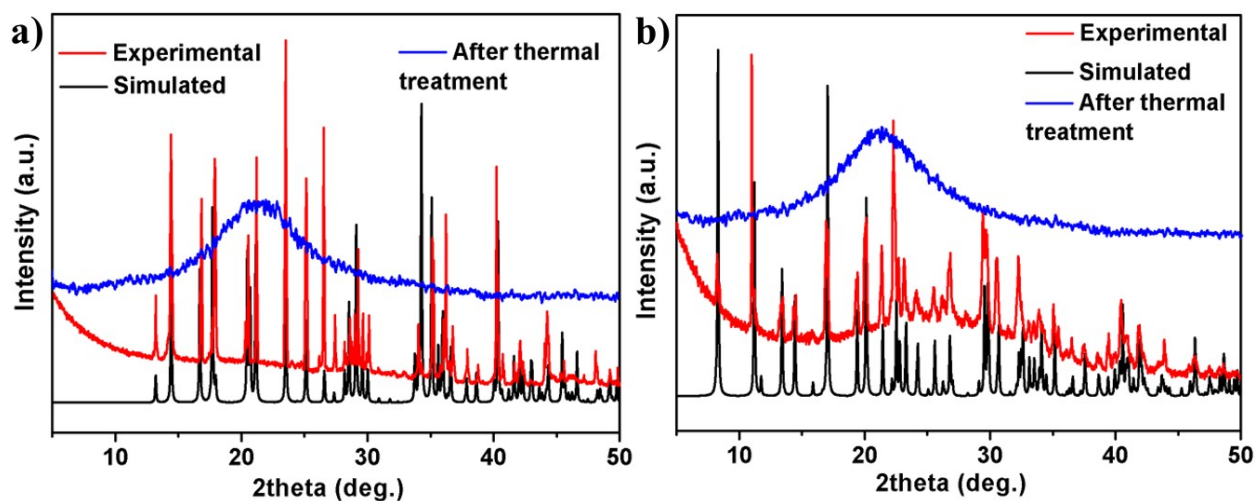

Figure S8. PXRD patterns before and after thermal treatments of **1** (a) and **2** (b).



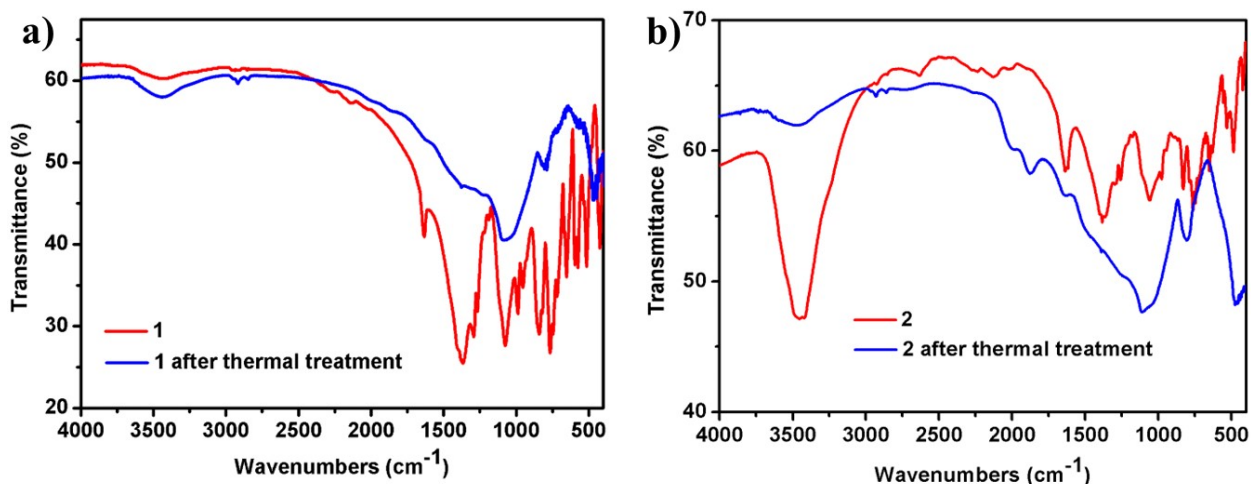

Figure S9. IR spectra of **1** (a) and **2** (b).

The IR spectra of **1** and **2** confirm the existences of  $\text{BO}_3$ ,  $\text{BO}_4$  and  $-\text{OH}$  groups. The absorption peaks from  $1468\text{--}1248\text{ cm}^{-1}$  and  $1127\text{--}915\text{ cm}^{-1}$  are the asymmetric stretching vibrations of  $\text{BO}_3$  and  $\text{BO}_4$  groups, respectively. The peak at  $3452\text{ cm}^{-1}$  for **2** is assigned to the asymmetric stretching vibrations of  $-\text{OH}$  groups. The inconsistencies of the peaks between samples before and after thermal treatments indicate that the frameworks of **1** and **2** have collapsed.

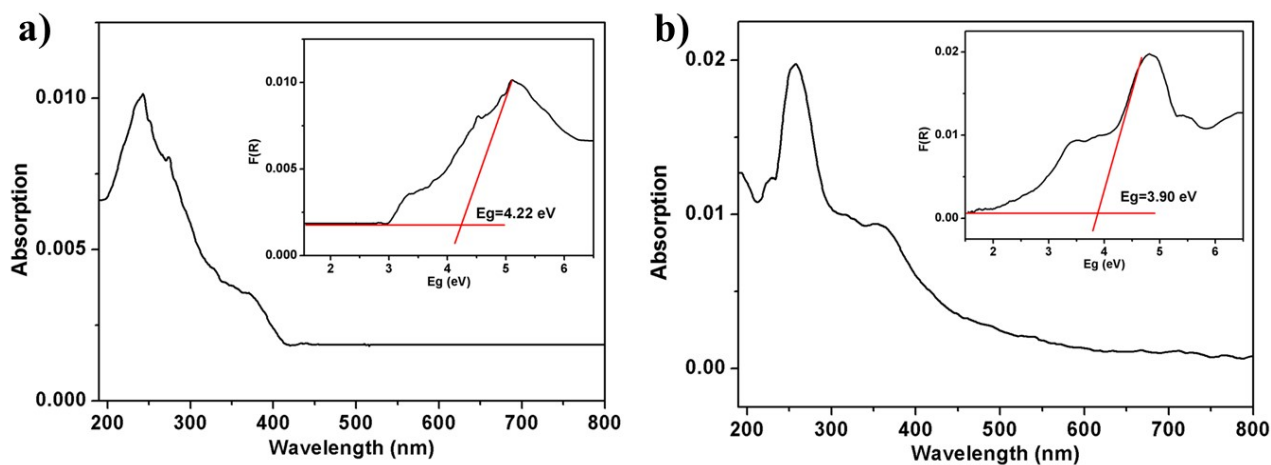

Figure S10. UV-Vis spectra of **1** (a) and **2** (b).

UV-Vis absorption spectra show that the band gaps of **1** and **2** are 4.22 and 3.90 eV, respectively, indicating that they are wide-band semiconductors. The small absorptions observed around 360nm can be attributed to the impurities of the raw materials or from their extrinsic midgap states, which appeared in other reported GBOs.<sup>1,2</sup>

[1] J. Sun, M. Mutailipu and S. L. Pan, *Chem. Eur. J.*, 2021, **27**, 8698-8703.

[2] W. L. Gao, Y. Jing, J. Yang, Z. Y. Zhou, D. F. Yang, J. L. Sun, J. H. Lin, R. H. Cong and T. Yang, *Inorg. Chem.*, 2014, **53**, 2364–2366.
